# Supplementary material for: Short- and Medium-Chain Chlorinated Paraffins in the Sediment of the East China Sea and Yellow Sea: Distribution, Composition, and Ecological Risks
Source: MDPI journal article supplement (doi:10.3390/toxics11070558), 2023-06-26
Supplement: s1 [file s1]

# Short- and Medium-Chain Chlorinated Paraffins in the Sediment of the East China Sea and Yellow Sea: Distribution, Composition, and Ecological Risks

Xiaoying Li <sup>1</sup>, Haiqiang Guo <sup>1</sup>, Jianyao Hong <sup>1,2</sup>, Yuan Gao <sup>2,\*</sup>, Xindong Ma <sup>3</sup> and Jiping Chen <sup>2</sup>

<sup>1</sup> College of Environmental Science and Engineering, Dalian Maritime University, Dalian 116026, China

<sup>2</sup> CAS Key Laboratory of Separation Sciences for Analytical Chemistry, Dalian Institute of Chemical Physics, Chinese Academy of Sciences, 457 Zhongshan Road, Shahekou District, Dalian 116023, China

<sup>3</sup> State Environmental Protection Key Laboratory of Coastal Ecosystem, National Marine Environmental Monitoring Center, Dalian 116023, China

\* Correspondence: acyoyo@dicp.ac.cn; Tel.: +86-411-8437-9972; Fax: +86-411-8437-9562

## Tables and Figures

### Tables:

**Table S1.** The congener groups, the percentage of Cl in molecular formula (Cl%), quantitation ion (QI, m/z), and confirmation ion (CI, m/z) for determination of 24 SCCP and 24 MCCP congeners with QI (m/z) of  $^{13}\text{C}_{10}$ -trans-chlordane and hexachlorobenzene.

**Table S2.** Comparison of SCCPs and MCCPs concentrations (ng/g dw) in marine sediments of this study with other studies.

**Table S3.** The relative abundance for chlorine homolog group profiles (%) in marine sediments of the East China Sea and Yellow Sea.

### Figures:

**Figure S1.** Spearman correlations among 24 SCCPs and 24 MCCPs in marine sediments in the East China Sea and Yellow Sea.

**Figure S2.** The proportion of C<sub>10</sub>-, C<sub>11</sub>-, C<sub>12</sub>-, C<sub>13</sub>-congeners in SCCPs and C<sub>14</sub>-, C<sub>15</sub>-, C<sub>16</sub>-, C<sub>17</sub>-congeners in MCCPs for marine sediment in the East China Sea and Yellow Sea.

**Figure S3.** The proportion of Cl<sub>5</sub>-, Cl<sub>6</sub>-, Cl<sub>7</sub>-, Cl<sub>8</sub>-, Cl<sub>9</sub>-, Cl<sub>10</sub>-congeners in SCCPs and MCCPs for marine sediment in the East China Sea and Yellow Sea.

**Figure S4.** The concentration of SCCPs and MCCPs in the East China Sea (in black) and Yellow Sea (in red).

**Table S1.** The congener groups, the percentage of Cl in molecular formula (Cl%), quantitation ion (QI, m/z), and confirmation ion (CI, m/z) for determination of 24 SCCP and 24 MCCP congeners with QI ( m/z) of <sup>13</sup>C<sub>10</sub>-trans-chlordane and hexachlorobenzene.

| SCCPs                                            | Cl%  | QI (m/z) | CI (m/z) | MCCPs                                            | Cl%  | QI (m/z) | CI (m/z) |
|--------------------------------------------------|------|----------|----------|--------------------------------------------------|------|----------|----------|
| C <sub>10</sub> H <sub>17</sub> Cl <sub>5</sub>  | 56.4 | 279      | 277      | C <sub>14</sub> H <sub>25</sub> Cl <sub>5</sub>  | 47.8 | 333      | 335      |
| C <sub>10</sub> H <sub>16</sub> Cl <sub>6</sub>  | 61.0 | 313      | 315      | C <sub>14</sub> H <sub>24</sub> Cl <sub>6</sub>  | 52.5 | 369      | 371      |
| C <sub>10</sub> H <sub>15</sub> Cl <sub>7</sub>  | 64.7 | 347      | 349      | C <sub>14</sub> H <sub>23</sub> Cl <sub>7</sub>  | 56.5 | 403      | 405      |
| C <sub>10</sub> H <sub>14</sub> Cl <sub>8</sub>  | 67.9 | 381      | 383      | C <sub>14</sub> H <sub>22</sub> Cl <sub>8</sub>  | 59.8 | 437      | 439      |
| C <sub>10</sub> H <sub>13</sub> Cl <sub>9</sub>  | 70.6 | 417      | 415      | C <sub>14</sub> H <sub>21</sub> Cl <sub>9</sub>  | 62.8 | 473      | 471      |
| C <sub>10</sub> H <sub>12</sub> Cl <sub>10</sub> | 72.8 | 451      | 449      | C <sub>14</sub> H <sub>20</sub> Cl <sub>10</sub> | 65.3 | 505      | 507      |
| C <sub>11</sub> H <sub>19</sub> Cl <sub>5</sub>  | 54.3 | 293      | 291      | C <sub>15</sub> H <sub>27</sub> Cl <sub>5</sub>  | 46.1 | 349      | 347      |
| C <sub>11</sub> H <sub>18</sub> Cl <sub>6</sub>  | 58.9 | 327      | 329      | C <sub>15</sub> H <sub>26</sub> Cl <sub>6</sub>  | 50.8 | 383      | 385      |
| C <sub>11</sub> H <sub>17</sub> Cl <sub>7</sub>  | 62.8 | 361      | 363      | C <sub>15</sub> H <sub>25</sub> Cl <sub>7</sub>  | 54.7 | 417      | 419      |
| C <sub>11</sub> H <sub>16</sub> Cl <sub>8</sub>  | 66.0 | 395      | 397      | C <sub>15</sub> H <sub>24</sub> Cl <sub>8</sub>  | 58.1 | 451      | 453      |
| C <sub>11</sub> H <sub>15</sub> Cl <sub>9</sub>  | 68.7 | 431      | 429      | C <sub>15</sub> H <sub>23</sub> Cl <sub>9</sub>  | 61.1 | 485      | 487      |
| C <sub>11</sub> H <sub>14</sub> Cl <sub>10</sub> | 71.1 | 465      | 463      | C <sub>15</sub> H <sub>22</sub> Cl <sub>10</sub> | 63.7 | 521      | 519      |
| C <sub>12</sub> H <sub>21</sub> Cl <sub>5</sub>  | 52.4 | 307      | 305      | C <sub>16</sub> H <sub>29</sub> Cl <sub>5</sub>  | 44.5 | 361      | 363      |
| C <sub>12</sub> H <sub>20</sub> Cl <sub>6</sub>  | 57.0 | 341      | 343      | C <sub>16</sub> H <sub>28</sub> Cl <sub>6</sub>  | 49.1 | 397      | 399      |
| C <sub>12</sub> H <sub>19</sub> Cl <sub>7</sub>  | 60.9 | 375      | 377      | C <sub>16</sub> H <sub>27</sub> Cl <sub>7</sub>  | 53.1 | 431      | 433      |
| C <sub>12</sub> H <sub>18</sub> Cl <sub>8</sub>  | 64.2 | 409      | 411      | C <sub>16</sub> H <sub>26</sub> Cl <sub>8</sub>  | 56.5 | 465      | 467      |
| C <sub>12</sub> H <sub>17</sub> Cl <sub>9</sub>  | 67.0 | 445      | 443      | C <sub>16</sub> H <sub>25</sub> Cl <sub>9</sub>  | 59.5 | 501      | 499      |
| C <sub>12</sub> H <sub>16</sub> Cl <sub>10</sub> | 69.4 | 479      | 477      | C <sub>16</sub> H <sub>24</sub> Cl <sub>10</sub> | 62.1 | 535      | 533      |
| C <sub>13</sub> H <sub>23</sub> Cl <sub>5</sub>  | 50.6 | 321      | 319      | C <sub>17</sub> H <sub>31</sub> Cl <sub>5</sub>  | 43.0 | 375      | 377      |
| C <sub>13</sub> H <sub>22</sub> Cl <sub>6</sub>  | 55.3 | 355      | 357      | C <sub>17</sub> H <sub>30</sub> Cl <sub>6</sub>  | 47.6 | 411      | 413      |
| C <sub>13</sub> H <sub>21</sub> Cl <sub>7</sub>  | 59.2 | 389      | 391      | C <sub>17</sub> H <sub>29</sub> Cl <sub>7</sub>  | 51.5 | 443      | 445      |
| C <sub>13</sub> H <sub>20</sub> Cl <sub>8</sub>  | 62.5 | 423      | 425      | C <sub>17</sub> H <sub>28</sub> Cl <sub>8</sub>  | 55.0 | 477      | 479      |

|                                                  |      |       |     |                                                  |      |     |     |
|--------------------------------------------------|------|-------|-----|--------------------------------------------------|------|-----|-----|
| C <sub>13</sub> H <sub>19</sub> Cl <sub>9</sub>  | 65.3 | 459   | 457 | C <sub>17</sub> H <sub>27</sub> Cl <sub>9</sub>  | 58.0 | 515 | 513 |
| C <sub>13</sub> H <sub>18</sub> Cl <sub>10</sub> | 67.8 | 493   | 491 | C <sub>17</sub> H <sub>26</sub> Cl <sub>10</sub> | 60.6 | 549 | 547 |
| <sup>13</sup> C <sub>10</sub> -trans-chlordane   |      | 419.8 |     | Hexachlorobenzene                                |      | 284 |     |

**Table S2.** Comparison of SCCPs and MCCPs concentrations (ng/g dw) in marine sediments of this study with other studies.

| Sampling Year | Sampling cities                                                | Number of samples | The thickness of sediment | SCCPs |      |        |      |            | MCCPs |       |        |       |             |
|---------------|----------------------------------------------------------------|-------------------|---------------------------|-------|------|--------|------|------------|-------|-------|--------|-------|-------------|
|               |                                                                |                   |                           | DF    | GM   | Median | Mean | Range      | DF    | GM    | Median | Mean  | Range       |
| 2019          | East China Sea and Yellow Sea (this study)                     | 29                | Surface sediment (0-5 cm) | 100%  | 1.96 | 1.70   | 2.55 | 0.703–13.4 | 100%  | 0.259 | 0.212  | 0.468 | 0.0936–4.19 |
| 2009 [1]      | Laizhou Bay                                                    | 29                | Surface sediment          | 100%  | 10.4 | 10.2   | 11.1 | 5.10–22.0  | 100%  | 6.11  | 5.55   | 9.65  | 2.20–63.0   |
| 2017 [2]      | Yangtze River Estuary and adjacent East China Sea              | 87                | Surface sediment (0-5 cm) | 100%  | NP   | 13.8   | 18.6 | 2.85–94.7  | 100%  | NP    | 13.3   | 18.5  | 3.33–77.8   |
| 2007 [3]      | Firth of Clyde in Scotland                                     | 11                | Surface sediment (0-5 cm) | 100%  | 15.3 | 31.0   | 34.3 | 0.40–69.0  | NP    | NP    | NP     | NP    | NP          |
| 2017 [4]      | Shandong Peninsula                                             | 87                | Intertidal sediment       | 96.6% | 89.1 | 82.2   | 117  | <MDL–453   | NA    | NA    | NA     | NA    | NA          |
| 2017–2019 [5] | the South China Coast (Guangdong, Fujian, Guangxi, and Hainan) | 72                | Mangrove sediments        | 100%  | 345  | 331    | 371  | 133–716    | 100%  | 647   | 666    | 937   | 103–4160    |
| 2010–2011 [6] | East China Sea                                                 | 37                | Surface sediment (0-3 cm) | 100%  | 22.7 | 24.7   | 24.0 | 9.00–37.2  | NA    | NA    | NA     | NA    | NA          |
| 2019 [7]      | East China Sea                                                 | 40                | Surface sediment (0-3 cm) | 100%  | NP   | 189    | 194  | 89.6–351   | NA    | NA    | NA     | NA    | NA          |

|                   |                     |    |                     |    |    |    |      |    |    |    |    |    |    |
|-------------------|---------------------|----|---------------------|----|----|----|------|----|----|----|----|----|----|
| 2009–<br>2010 [8] | Pearl River Estuary | 13 | Estuarine sediments | NP | NP | NP | 1700 | NP | NP | NP | NP | NP | NP |
|-------------------|---------------------|----|---------------------|----|----|----|------|----|----|----|----|----|----|

DF: The detection frequency. GM: Geometric mean. NP: Not provided in previous study. NA: Not analyzed.

**Table S3.** The relative abundance for chlorine homolog group profiles (%) in marine sediments of the East China Sea and Yellow Sea.

| Sampling sites | SCCPs (%)       |                 |                 |                 |                 |                  | MCCPs (%)       |                |                 |                 |                 |                  |
|----------------|-----------------|-----------------|-----------------|-----------------|-----------------|------------------|-----------------|----------------|-----------------|-----------------|-----------------|------------------|
|                | Cl <sub>5</sub> | Cl <sub>6</sub> | Cl <sub>7</sub> | Cl <sub>8</sub> | Cl <sub>9</sub> | Cl <sub>10</sub> | Cl <sub>5</sub> | C <sub>6</sub> | Cl <sub>7</sub> | Cl <sub>8</sub> | Cl <sub>9</sub> | Cl <sub>10</sub> |
| S1             | 1.13            | 7.42            | 19.8            | 27.2            | 27.3            | 17.0             | 8.54            | 16.4           | 25.9            | 30.3            | 14.7            | 4.08             |
| S2             | 8.32            | 27.5            | 21.5            | 20.3            | 14.4            | 7.90             | 14.5            | 16.5           | 31.8            | 27.0            | 8.23            | 1.94             |
| S3             | 8.39            | 30.0            | 20.0            | 20.4            | 15.3            | 5.92             | 20.8            | 22.9           | 26.0            | 22.4            | 6.59            | 1.41             |
| S4             | 10.4            | 30.7            | 18.8            | 20.0            | 14.6            | 5.57             | 17.5            | 22.5           | 27.1            | 24.5            | 7.12            | 1.18             |
| S5             | 3.73            | 12.9            | 19.7            | 25.5            | 27.3            | 10.7             | 5.18            | 14.8           | 32.4            | 36.8            | 9.73            | 1.13             |
| S6             | 6.57            | 25.3            | 28.5            | 24.2            | 10.6            | 4.79             | 22.3            | 24.1           | 22.9            | 21.2            | 7.82            | 1.77             |
| S7             | 12.7            | 32.8            | 21.7            | 16.7            | 10.3            | 5.88             | 19.1            | 20.5           | 24.6            | 24.2            | 9.60            | 1.99             |
| S8             | 15.1            | 34.7            | 19.9            | 13.7            | 10.6            | 6.02             | 19.4            | 17.4           | 25.6            | 25.7            | 10.2            | 1.64             |
| S9             | 8.13            | 36.2            | 29.3            | 14.1            | 8.10            | 4.15             | 32.6            | 21.9           | 19.6            | 18.2            | 6.05            | 1.71             |
| S10            | 7.27            | 17.3            | 14.2            | 37.6            | 18.2            | 5.51             | 9.11            | 18.9           | 36.6            | 25.1            | 8.71            | 1.59             |
| S11            | 14.8            | 34.3            | 18.5            | 15.3            | 11.3            | 5.75             | 16.7            | 16.9           | 25.2            | 26.7            | 11.9            | 2.54             |
| S12            | 25.0            | 51.4            | 18.2            | 3.15            | 1.32            | 0.870            | 61.5            | 16.0           | 9.95            | 8.26            | 3.04            | 1.28             |
| S13            | 8.56            | 26.7            | 23.1            | 25.4            | 12.7            | 3.63             | 33.9            | 16.5           | 19.2            | 19.5            | 9.12            | 1.70             |
| S14            | 16.4            | 47.3            | 22.0            | 6.85            | 4.94            | 2.55             | 35.1            | 20.8           | 21.5            | 14.0            | 6.73            | 1.75             |
| S15            | 10.8            | 35.3            | 28.2            | 15.2            | 7.33            | 3.16             | 29.1            | 30.1           | 20.1            | 13.8            | 5.47            | 1.45             |
| S16            | 15.0            | 39.9            | 22.1            | 12.2            | 6.86            | 3.92             | 29.8            | 24.9           | 21.4            | 16.4            | 5.08            | 2.47             |
| S17            | 14.9            | 49.1            | 25.3            | 6.70            | 2.80            | 1.20             | 49.5            | 20.2           | 13.6            | 11.5            | 3.65            | 1.54             |
| S18            | 7.08            | 30.3            | 23.5            | 16.7            | 15.9            | 6.52             | 14.4            | 16.9           | 27.5            | 30.5            | 9.24            | 1.53             |
| S19            | 15.2            | 39.4            | 27.9            | 10.2            | 4.25            | 3.09             | 41.1            | 27.5           | 13.8            | 11.3            | 4.28            | 2.07             |
| S20            | 16.9            | 41.5            | 26.9            | 7.68            | 3.98            | 3.14             | 41.3            | 31.7           | 11.7            | 8.22            | 5.13            | 1.91             |
| S21            | 14.0            | 36.1            | 28.6            | 11.1            | 6.79            | 3.43             | 28.2            | 31.5           | 18.4            | 15.2            | 5.28            | 1.33             |
| S22            | 7.56            | 25.8            | 28.7            | 17.9            | 14.0            | 6.03             | 11.8            | 27.2           | 29.4            | 23.1            | 7.46            | 1.15             |

|     |      |      |      |      |      |      |      |      |      |      |      |      |
|-----|------|------|------|------|------|------|------|------|------|------|------|------|
| S23 | 15.0 | 34.9 | 28.2 | 10.0 | 7.64 | 4.22 | 26.0 | 28.1 | 19.5 | 17.0 | 7.22 | 2.16 |
| S24 | 14.3 | 41.4 | 25.5 | 10.8 | 5.20 | 2.70 | 34.4 | 21.5 | 18.9 | 17.1 | 6.62 | 1.51 |
| S25 | 4.97 | 18.6 | 26.3 | 23.7 | 19.1 | 7.31 | 6.89 | 24.0 | 31.7 | 26.8 | 9.18 | 1.49 |
| S26 | 8.51 | 30.3 | 26.9 | 17.6 | 11.0 | 5.77 | 15.1 | 26.1 | 26.7 | 22.5 | 8.09 | 1.55 |
| S27 | 15.2 | 42.5 | 24.1 | 9.07 | 6.01 | 3.14 | 25.3 | 25.7 | 21.6 | 18.8 | 7.20 | 1.41 |
| S28 | 11.1 | 38.0 | 29.7 | 11.0 | 6.45 | 3.79 | 30.7 | 30.4 | 17.2 | 14.0 | 5.88 | 1.81 |
| S29 | 12.4 | 37.0 | 22.4 | 12.8 | 9.25 | 6.09 | 23.2 | 19.5 | 21.3 | 22.3 | 10.3 | 3.33 |



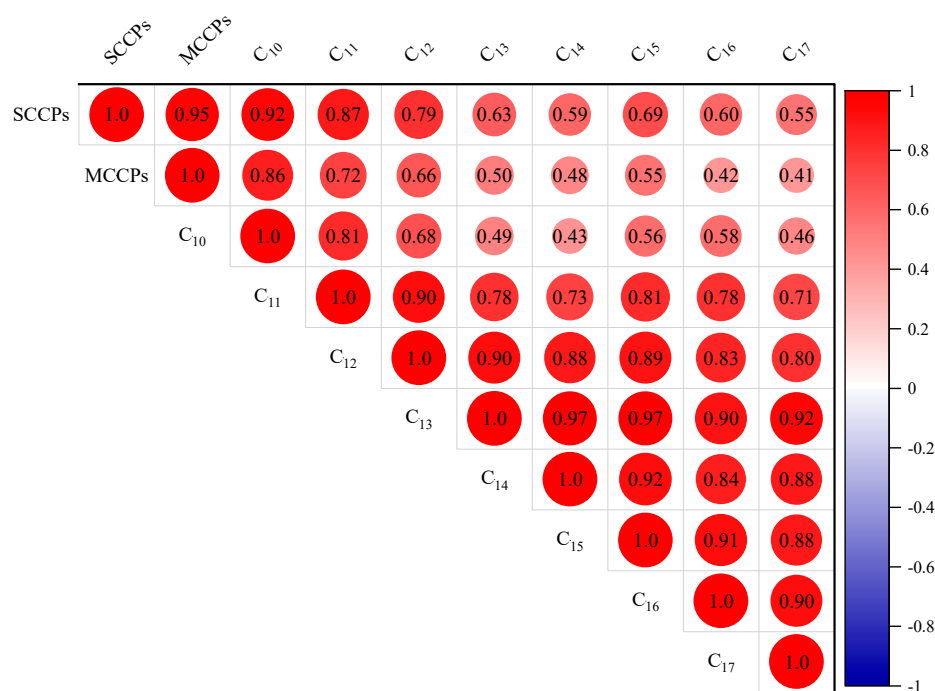

**Figure S1.** Spearman correlations among 24 SCCPs and 24 MCCPs in marine sediments in the East China Sea and Yellow Sea.

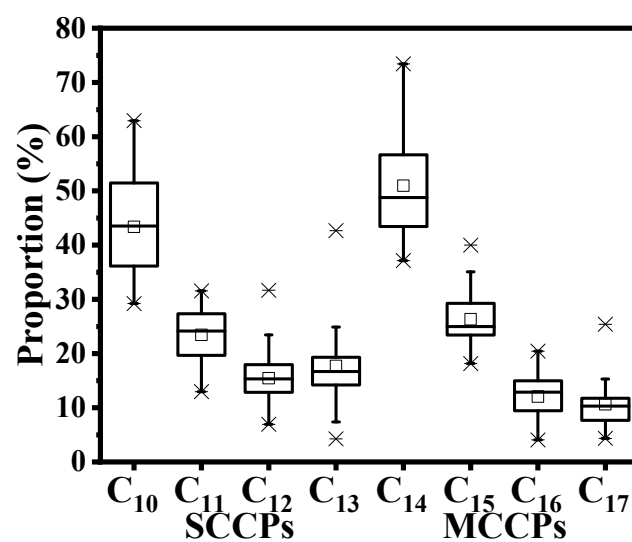

**Figure S2.** The proportion of C<sub>10</sub>-, C<sub>11</sub>-, C<sub>12</sub>-, C<sub>13</sub>-congeners in SCCPs and C<sub>14</sub>-, C<sub>15</sub>-, C<sub>16</sub>-, C<sub>17</sub>-congeners in MCCPs for marine sediment in the East China Sea and Yellow Sea.

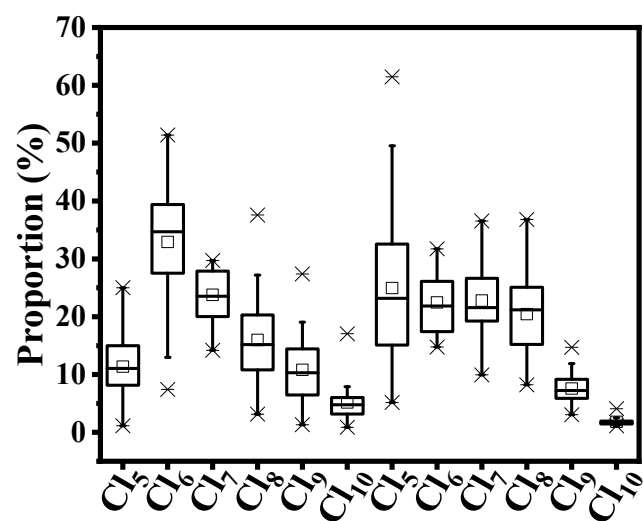

**Figure S3.** The proportion of Cl<sub>5</sub>-, Cl<sub>6</sub>-, Cl<sub>7</sub>-, Cl<sub>8</sub>-, Cl<sub>9</sub>-, Cl<sub>10</sub>-congeners in SCCPs and MCCPs for marine sediment in the East China Sea and Yellow Sea.

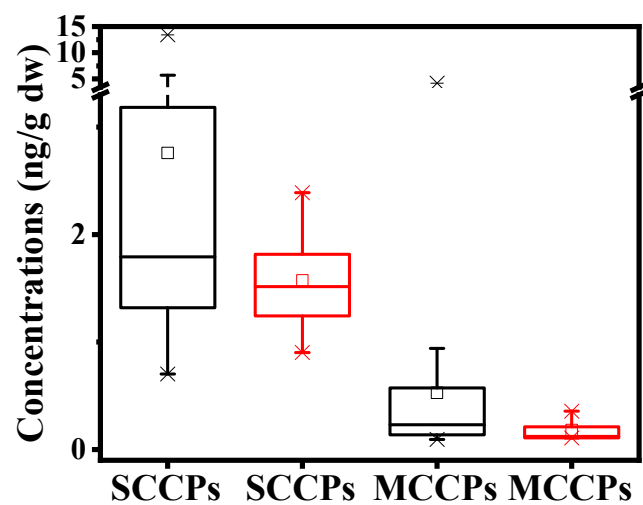

**Figure S4.** The concentration of SCCPs and MCCPs in the East China Sea (in black) and Yellow Sea (in red).

## References

1. Pan, X.H.; Tang, J.H.; Tian, C.G.; Li, J.; Zhang, G. Short- and medium-chain chlorinated paraffins in sediments from the Laizhou Bay area, North China: Implications for transportation from rivers to marine environment. *Environmental Pollution* **2018**, *243*, 1460-1468, doi:10.1016/j.envpol.2018.09.123.
2. Ji, B.J.; Wu, Y.; Liang, Y.; Gao, S.T.; Zeng, X.Y.; Yao, P.; Yu, Z.Q. Occurrence, congener patterns, and potential ecological risk of chlorinated paraffins in sediments of Yangtze River Estuary and adjacent East China Sea. *Environmental Monitoring and Assessment* **2022**, *194*, 329, doi:10.1007/s10661-022-09969-8.
3. Hussy, I.; Webster, L.; Russell, M.; Moffat, C. Determination of chlorinated paraffins in sediments from the Firth of Clyde by gas chromatography with electron capture negative ionisation mass spectrometry and carbon skeleton analysis by gas chromatography with flame ionisation detection. *Chemosphere* **2012**, *88*, 292-299, doi:10.1016/j.chemosphere.2012.02.040.
4. Zhao, N.; Cui, Y.; Wang, P.W.; Li, S.S.; Jiang, W.; Luo, N.N.; Wang, Z.H.; Chen, X.F.; Ding, L. Short-chain chlorinated paraffins in soil, sediment, and seawater in the intertidal zone of Shandong Peninsula, China: Distribution and composition. *Chemosphere* **2019**, *220*, 452-458, doi:10.1016/j.chemosphere.2018.12.063.
5. Chen, H.; Han, X.; Liang, B.W.; Deng, M.; Du, B.B.; Zeng, L.X. Spatial distribution, homologue patterns and ecological risks of chlorinated paraffins in mangrove sediments along the South China Coast. *Environmental Pollution* **2022**, *294*, 118623, doi:10.1016/j.envpol.2021.118623.
6. Zhao, Z.S.; Li, H.J.; Wang, Y.W.; Li, G.L.; Cao, Y.L.; Zeng, L.X.; Lan, J.; Wang, T.; Jiang, G.B. Source and Migration of Short-Chain Chlorinated Paraffins in the Coastal East China Sea Using Multiproxies of Marine Organic Geochemistry. *Environmental Science & Technology* **2013**, *47*, 5013-5022, doi:10.1021/es304899j.
7. Hu, H.M.; Jin, H.B.; Li, T.J.; Guo, Y.M.; Wu, P.F.; Xu, K.D.; Zhu, W.B.; Zhou, Y.Q.; Zhao, M.R. Spatial distribution, partitioning, and ecological risk of short chain chlorinated paraffins in seawater and sediment from East China Sea. *Science of the Total Environment* **2022**, *811*, 151932, doi:10.1016/j.scitotenv.2021.151932.
8. Chen, M.Y.; Luo, X.J.; Zhang, X.L.; He, M.J.; Chen, S.J.; Mi, B.X. Chlorinated Paraffins in Sediments from the Pearl River Delta, South China: Spatial and Temporal Distributions and Implication for Processes. *Environmental Science & Technology* **2011**, *45*, 9936-9943, doi:10.1021/es202891a.
